# Supplementary material
Source: MDPI journal article supplement (https://www.mdpi.com/1424-2818/14/6/432)
Supplement: s1 [file s1]

Supplementary Material

# Effects of landscape configuration on the body condition of migratory and resident Tropical birds

Dimas A. Molina-Marin, Juan C. Rodas-Rua, Carlos E. Lara, Fredy A. Rivera-Páez, Francisco E. Fontúrbel, Gabriel J. Castaño-Villa

**Table S1.** Coordinates (in decimal degrees) and mean elevation (in m) of the 26 localities included in our analysis (localities L<sub>1</sub> to L<sub>52</sub> were obtained from Cardona *et al.*, 2020; while L<sub>53-54</sub> corresponding to localities reporting by ISAGEN).

| ID              | Locality                               | Latitude | Longitude | Elevation |
|-----------------|----------------------------------------|----------|-----------|-----------|
| L <sub>1</sub>  | Las Margaritas                         | 5.13     | -75.72    | 956       |
| L <sub>3</sub>  | Vereda La Arboleda                     | 5.20     | -75.80    | 1224      |
| L <sub>4</sub>  | Vereda Varsovia                        | 5.25     | -75.54    | 1429      |
| L <sub>5</sub>  | Corregimiento La Zainera               | 5.03     | -75.81    | 1237      |
| L <sub>6</sub>  | Vereda La Esmeralda                    | 5.05     | -75.73    | 1025      |
| L <sub>11</sub> | Vereda Japón                           | 5.57     | -74.66    | 178       |
| L <sub>15</sub> | Vereda Alto del Naranjo                | 5.00     | -75.56    | 1749      |
| L <sub>19</sub> | Universidad de Caldas. Jardín Botánico | 5.05     | -75.49    | 2100      |
| L <sub>20</sub> | Corregimiento Colombia                 | 5.12     | -75.62    | 920       |
| L <sub>21</sub> | Corregimiento El Remanso               | 5.09     | -75.59    | 1257      |
| L <sub>24</sub> | Vereda El Llano                        | 5.46     | -75.59    | 1069      |
| L <sub>27</sub> | Vereda La Quiebra de Roque             | 5.67     | -74.77    | 204       |
| L <sub>29</sub> | Vereda San Antonio                     | 5.52     | -75.45    | 1829      |
| L <sub>30</sub> | Vereda Santágueda                      | 5.38     | -75.67    | 1021      |
| L <sub>32</sub> | Vereda San José                        | 5.38     | -75.13    | 1905      |
| L <sub>34</sub> | Vereda El Oro. Finca la Argentina      | 5.40     | -75.74    | 2279      |
| L <sub>35</sub> | Corregimiento Berlín                   | 5.60     | -74.94    | 878       |
| L <sub>40</sub> | Vereda Arrayanes                       | 5.06     | -75.77    | 1123      |
| L <sub>39</sub> | Vereda El Contento                     | 5.08     | -75.79    | 1697      |
| L <sub>41</sub> | Vereda Cabuyal                         | 5.46     | -75.63    | 1403      |
| L <sub>42</sub> | Vereda Bellavista                      | 5.33     | -74.91    | 976       |
| L <sub>45</sub> | Vereda La Pradera                      | 5.42     | -74.88    | 527       |
| L <sub>47</sub> | Vereda Gallinazo                       | 5.01     | -75.41    | 2299      |
| L <sub>52</sub> | Vereda La Alsacia                      | 5.06     | -75.91    | 1405      |
| L <sub>53</sub> | Vereda Montebello                      | 5.58     | -74.92    | 781       |
| L <sub>54</sub> | Vereda Puerto Hierro                   | 5.56     | -74.86    | 456       |

**Table S2.** Bird species included in the analysis according to the source database.

| Bird species                   | Cardona-Sala-<br>zar <i>et al.</i> ,<br>(2020)<br>(n) | GIET & GEBIOME,<br>2005 - 2007, 2011<br>and 2015<br>(n) | GEBIOME,<br>2021 - 2022<br>(n) | ISAGEN,<br>2014 - 2021<br>(n) |
|--------------------------------|-------------------------------------------------------|---------------------------------------------------------|--------------------------------|-------------------------------|
| <i>Cardellina canadensis</i>   | 10                                                    | 12                                                      | –                              | 3                             |
| <i>Catharus minimus</i>        | 4                                                     | 10                                                      | 1                              | 39                            |
| <i>Catharus ustulatus</i>      | 35                                                    | 96                                                      | 5                              | 156                           |
| <i>Euphonia lanirostris</i>    | 53                                                    | 18                                                      | –                              | 21                            |
| <i>Mionectes oleagineus</i>    | 59                                                    | 146                                                     | 11                             | 421                           |
| <i>Oporornis agilis</i>        | 2                                                     | 8                                                       | –                              | 2                             |
| <i>Parkesia noveboracensis</i> | 19                                                    | 3                                                       | –                              | 19                            |
| <i>Todirostrum cinereum</i>    | 15                                                    | 2                                                       | –                              | 6                             |
| <i>Zimmerius chrysops</i>      | 41                                                    | 15                                                      | 3                              | 0                             |
| <b>Total</b>                   | <b>238</b>                                            | <b>310</b>                                              | <b>20</b>                      | <b>667</b>                    |

**Table S3.** Configuration and landscape composition indices estimated with FRAGSTATS (details on each metric are given at Table 1 in the main text) for the sampling 26 localities. Details on each locality are presented in Table S1.

| ID              | LPI_crop | LPI_for | LPI_grass | PATCH<br>AREA_MN | ENN_MN | CONNECT |
|-----------------|----------|---------|-----------|------------------|--------|---------|
| L <sub>1</sub>  | 28.12    | 14.16   | 29.99     | 36.07            | 145.31 | 16.36   |
| L <sub>3</sub>  | 44.33    | 8.91    | 7.44      | 17.33            | 43.96  | 14.70   |
| L <sub>4</sub>  | 9.33     | 16.69   | 54.66     | 36.20            | 344.80 | 10.00   |
| L <sub>5</sub>  | 69.36    | 3.87    | 10.46     | 6.51             | 114.63 | 9.52    |
| L <sub>6</sub>  | 7.09     | 61.16   | 9.84      | 146.44           | 31.75  | 40.00   |
| L <sub>11</sub> | 58.06    | 33.93   | 0.15      | 95.47            | 71.32  | 28.57   |
| L <sub>15</sub> | 23.18    | 7.84    | 14.24     | 28.25            | 197.92 | 13.10   |
| L <sub>19</sub> | 1.15     | 17.04   | 0.02      | 11.33            | 52.89  | 23.80   |
| L <sub>20</sub> | 32.87    | 24.92   | 7.60      | 68.09            | 33.91  | 19.69   |
| L <sub>21</sub> | 0.97     | 4.83    | 80.53     | 7.72             | 122.80 | 15.23   |
| L <sub>24</sub> | 15.99    | 10.38   | 2.23      | 17.03            | 39.57  | 20.00   |
| L <sub>27</sub> | 36.52    | 57.55   | 0.30      | 173.40           | 30.52  | 42.85   |
| L <sub>29</sub> | 18.28    | 4.82    | 16.30     | 10.09            | 91.48  | 9.09    |
| L <sub>30</sub> | 43.77    | 8.27    | 7.49      | 17.06            | 61.88  | 26.92   |
| L <sub>32</sub> | 7.87     | 19.75   | 38.62     | 48.58            | 48.98  | 27.77   |
| L <sub>34</sub> | 6.27     | 53.35   | 5.13      | 148.29           | 30.05  | 21.66   |
| L <sub>35</sub> | 6.73     | 46.42   | 3.79      | 123.26           | 30.56  | 33.33   |
| L <sub>40</sub> | 17.44    | 14.36   | 20.74     | 32.05            | 42.81  | 25.00   |
| L <sub>39</sub> | 3.32     | 10.45   | 60.36     | 17.34            | 102.21 | 66.66   |
| L <sub>41</sub> | 28.68    | 12.58   | 28.92     | 22.68            | 53.71  | 13.04   |
| L <sub>42</sub> | 9.56     | 46.03   | 2.00      | 105.59           | 30.00  | 47.61   |
| L <sub>45</sub> | 6.17     | 41.13   | 12.93     | 137.08           | 32.59  | 66.66   |
| L <sub>47</sub> | 6.26     | 79.52   | 0.49      | 247.07           | 30.01  | 47.61   |
| L <sub>52</sub> | 7.26     | 18.38   | 11.22     | 35.24            | 31.92  | 23.80   |
| L <sub>53</sub> | 17.16    | 44.81   | 0.61      | 18.76            | 46.47  | 30.91   |
| L <sub>54</sub> | 5.033    | 78.31   | 0.69      | 27.41            | 53.50  | 33.33   |

**Table S4.** Results from Bayesian Linear Mixed Models to relate body condition and landscape metrics (after accounting for multicollinearity and removing those variables with VIF > 2). This model includes all bird species (residents + neo-tropical migrants;  $n = 1235$ ). Variables with a  $p$ -value < 0.05 are denoted in bold type.

| Index              | VIF          | post mean    | 95% CI                | $p_{\text{MCMC}}$ |
|--------------------|--------------|--------------|-----------------------|-------------------|
| <b>LPI_CROP</b>    | <b>1.365</b> | <b>0.335</b> | <b>0.134 to 0.507</b> | <b>&lt;0.001</b>  |
| PATCH_AREA_MN      | 1.125        | -0.005       | -0.178 to 0.155       | 0.956             |
| ENN_MN             | 1.411        | 0.054        | -0.159 to 0.278       | 0.894             |
| <b>CONNECT</b>     | <b>1.843</b> | <b>0.293</b> | <b>0.082 to 0.525</b> | <b>0.006</b>      |
| <b>CAPTURE DAY</b> | <b>1.056</b> | <b>0.169</b> | <b>0.008 to 0.310</b> | <b>0.032</b>      |

**Table S5.** Results from Bayesian Linear Mixed Models to body condition and landscape metrics (after accounting for multicollinearity and removing those variables with VIF > 2). This model includes only migrant birds ( $n = 424$ ). Variables with a  $p$ -value < 0.05 are denoted in bold type.

| Index           | VIF          | post mean    | 95% CI                | $p_{\text{MCMC}}$ |
|-----------------|--------------|--------------|-----------------------|-------------------|
| <b>LPI_CROP</b> | <b>1.365</b> | <b>0.871</b> | <b>0.274 to 1.483</b> | <b>0.004</b>      |
| PATCH_AREA_MN   | 1.125        | -0.190       | -0.618 to 0.237       | 0.378             |
| ENN_MN          | 1.411        | 0.142        | -0.387 to 0.637       | 0.582             |
| <b>CONNECT</b>  | <b>1.843</b> | <b>0.606</b> | <b>0.044 to 1.207</b> | <b>0.036</b>      |
| CAPTURE DAY     | 1.056        | 0.224        | -0.116 to 0.626       | 0.232             |

**Table S6.** Results from Bayesian Linear Mixed Models to relate body condition and landscape metrics (after accounting for multicollinearity and removing those variables with VIF > 2). This model includes only resident birds ( $n = 811$ ). Variables with a  $p$ -value < 0.05 are denoted in bold type.

| Index                | VIF          | post mean    | 95% CI                 | $p_{\text{MCMC}}$ |
|----------------------|--------------|--------------|------------------------|-------------------|
| <b>LPI_CROP</b>      | <b>1.434</b> | <b>0.161</b> | <b>0.0376 to 0.280</b> | <b>0.006</b>      |
| <b>PATCH_AREA_MN</b> | <b>1.111</b> | <b>0.112</b> | <b>0.005 to 0.219</b>  | <b>0.036</b>      |
| ENN_AM               | 1.586        | 0.088        | -0.044 to 0.222        | 0.214             |
| <b>CONNECT</b>       | <b>1.988</b> | <b>0.169</b> | <b>0.027 to 0.317</b>  | <b>0.024</b>      |
| <b>CAPTURE DAY</b>   | <b>1.011</b> | <b>0.126</b> | <b>0.006 to 0.238</b>  | <b>0.040</b>      |

**Trace of (Intercept)**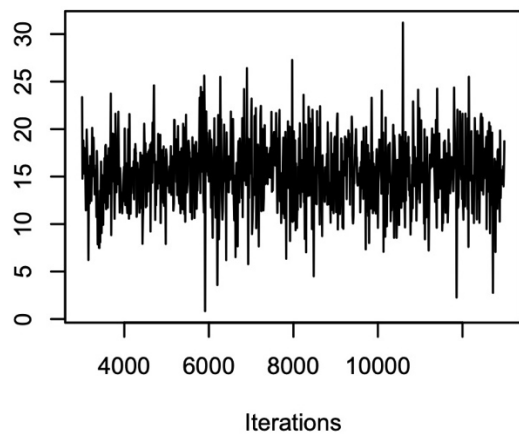**Density of (Intercept)**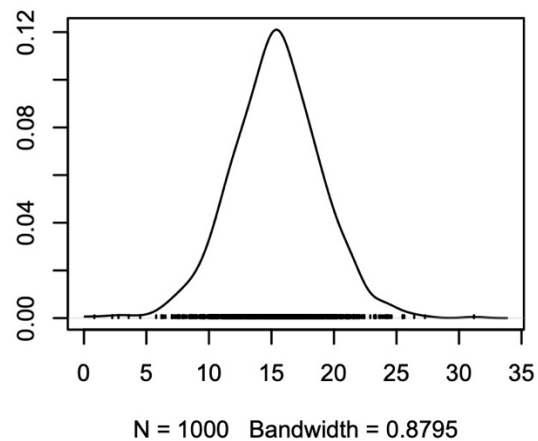**Trace of c.capture\_day**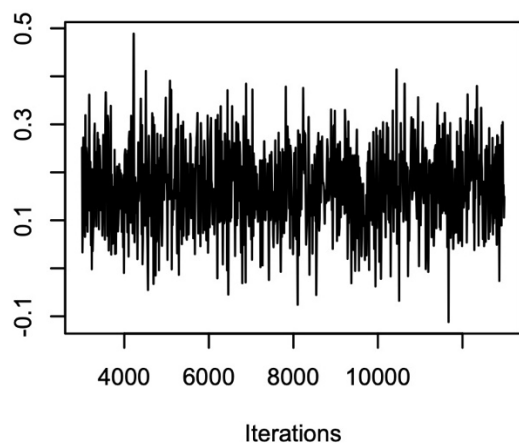**Density of c.capture\_day**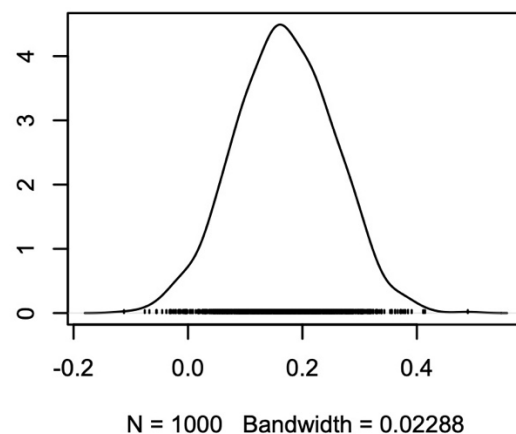**Trace of c.lpi\_crop**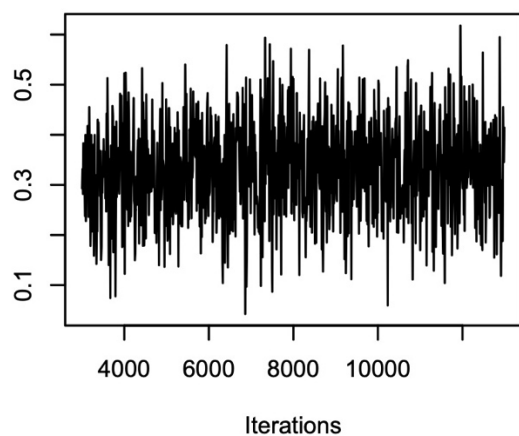**Density of c.lpi\_crop**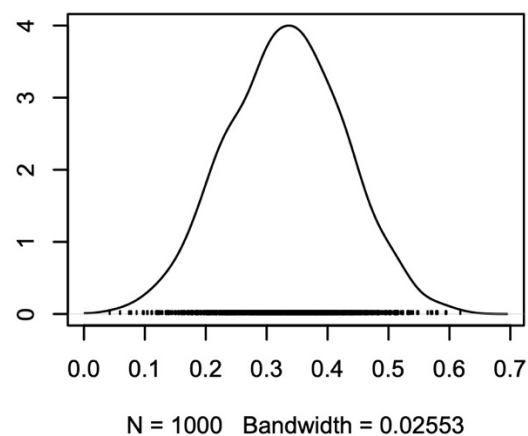

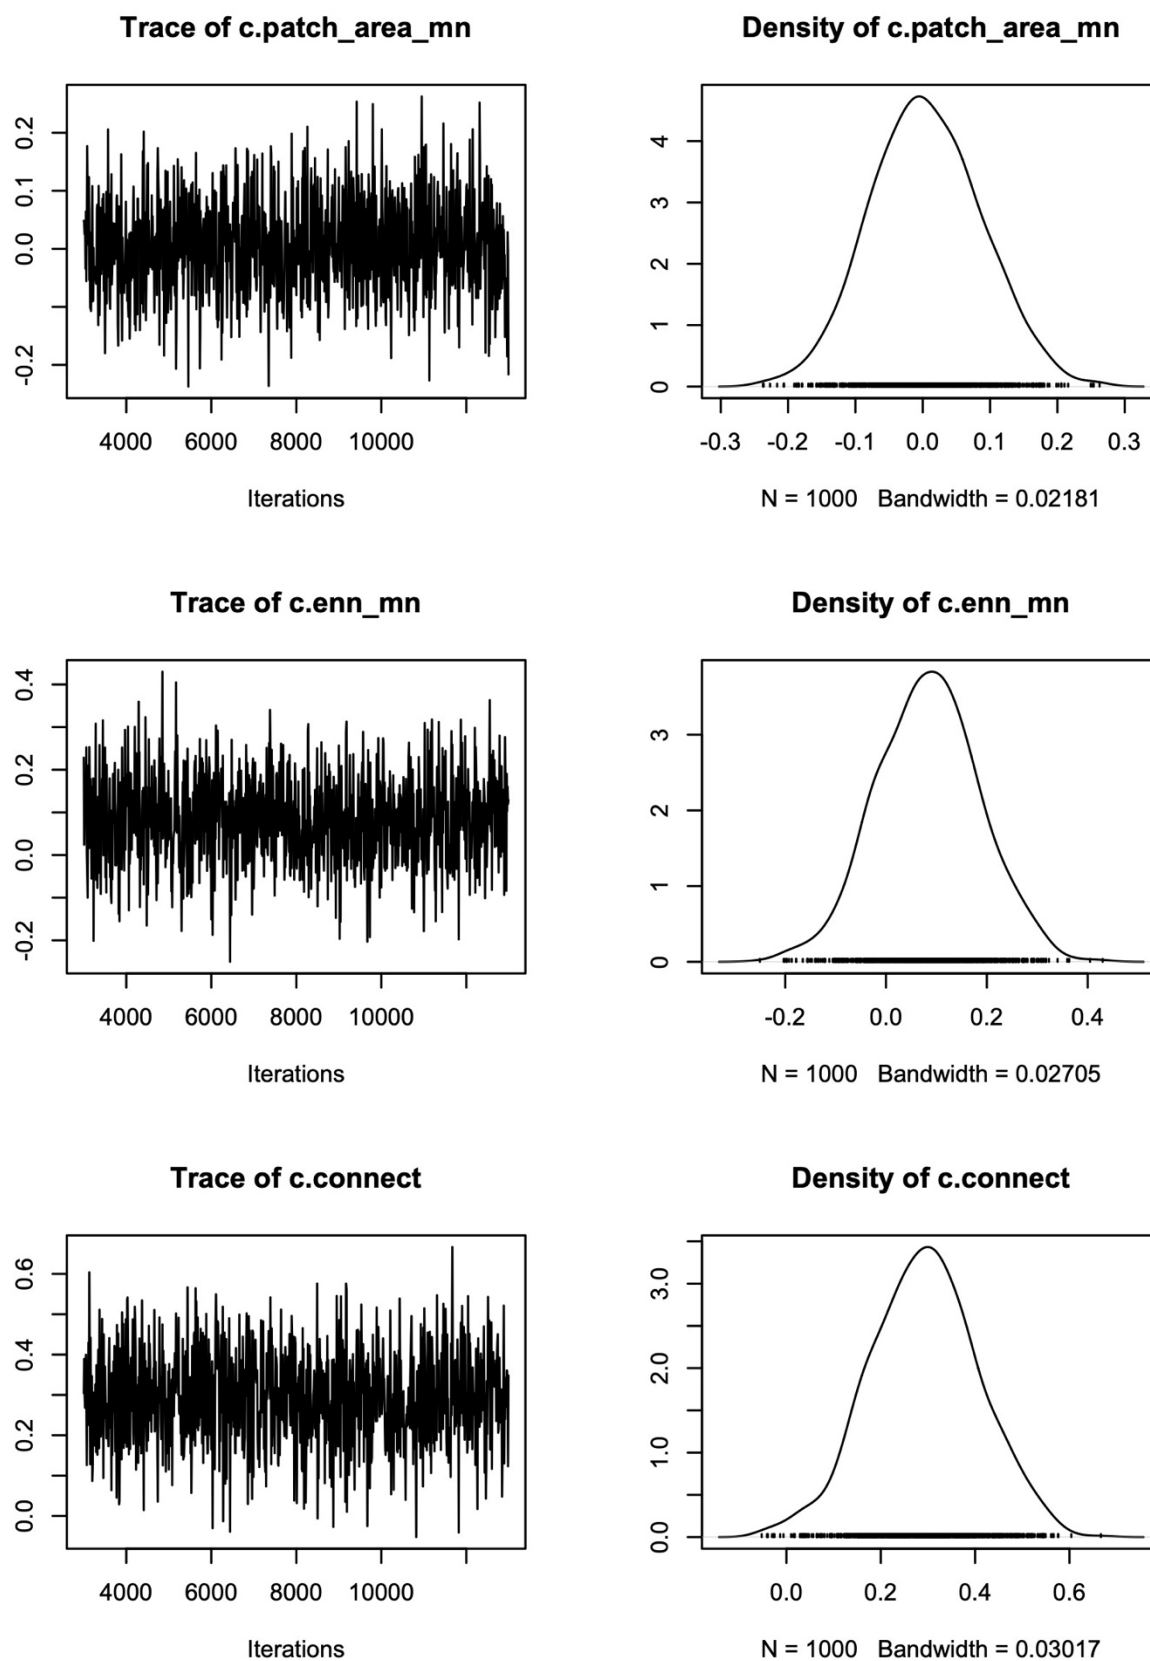

**Figure S1.** Summary of the Markov Chain for the BLMM including all bird species. Left plots depict the trace of the sampled posterior, and the right plots depicts the density estimate approximating the posterior distribution.

**Trace of (Intercept)**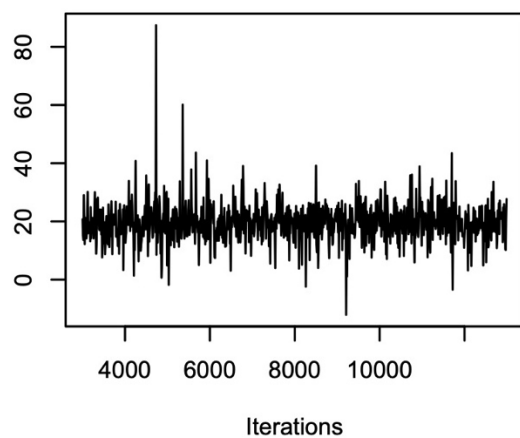**Density of (Intercept)**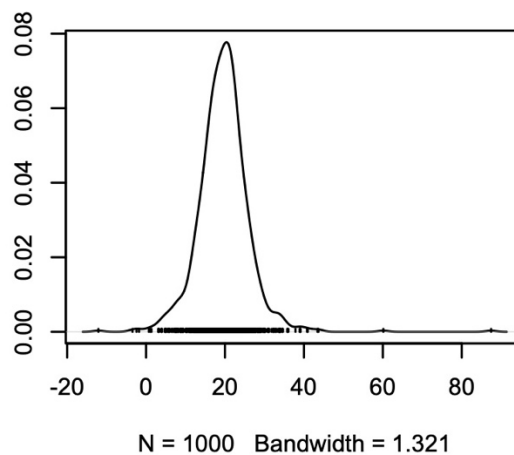**Trace of c.capture\_day**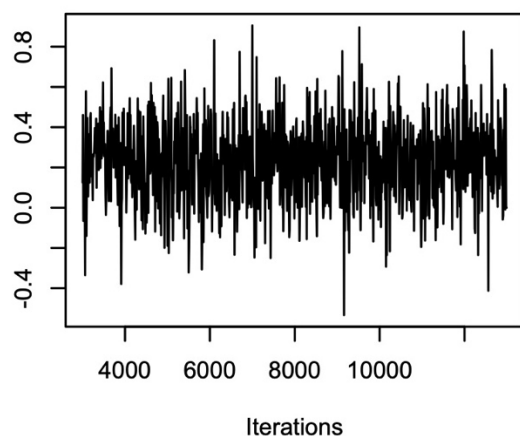**Density of c.capture\_day**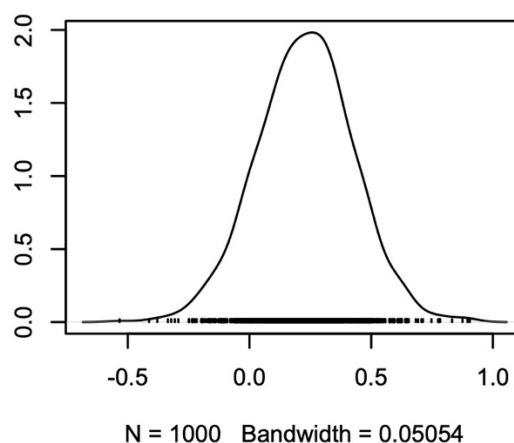**Trace of c.lpi\_crop**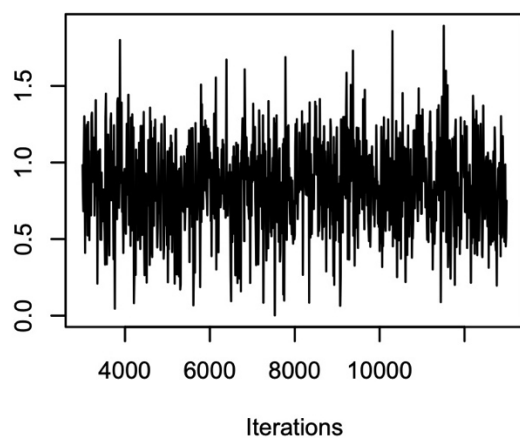**Density of c.lpi\_crop**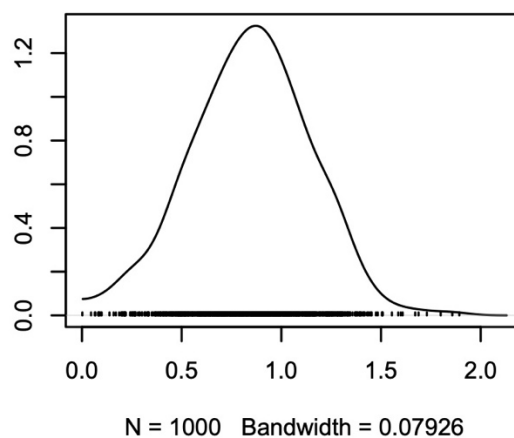



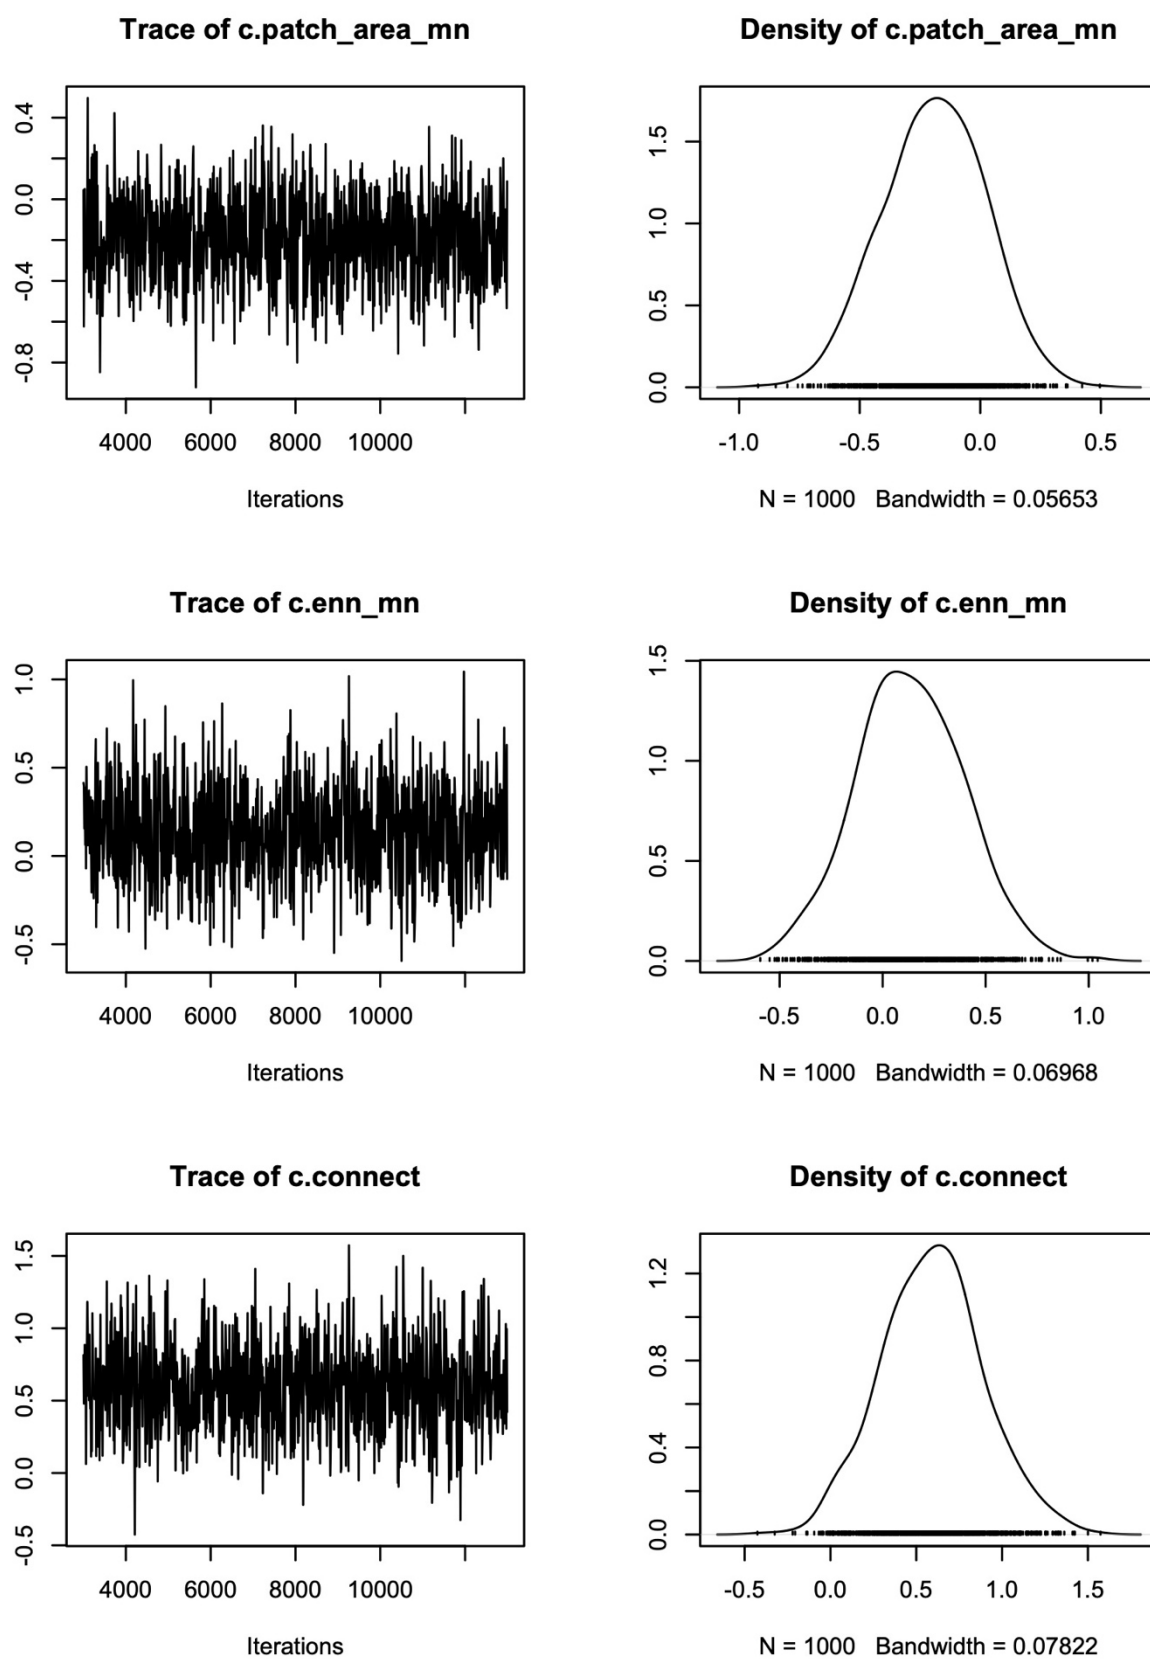

**Figure S2.** Summary of the Markov Chain for the BLMM for migrant bird species. Left plots depict the trace of the sampled posterior, and the right plots depicts the density estimate approximating the posterior distribution.

**Trace of (Intercept)**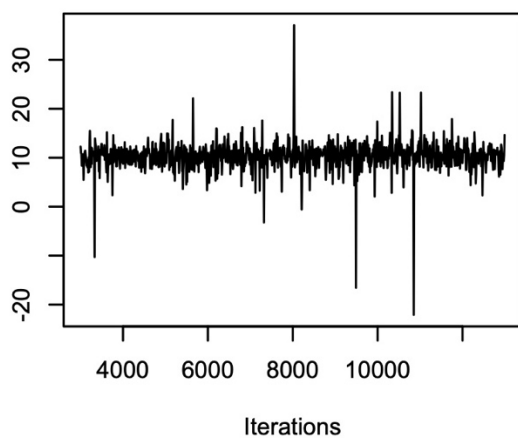**Density of (Intercept)**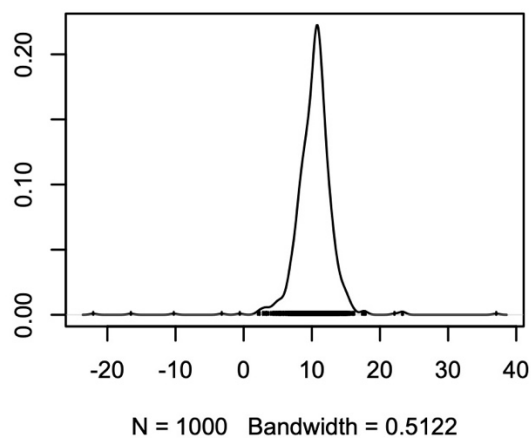**Trace of c.capture\_day**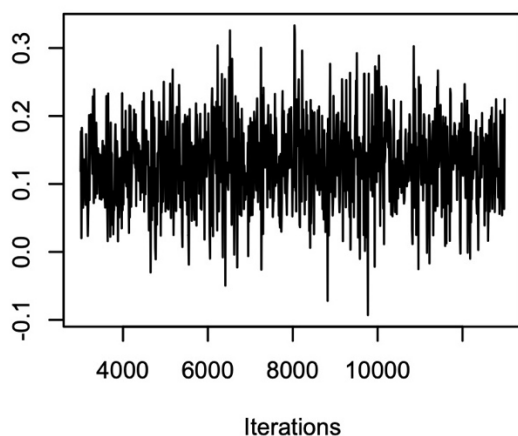**Density of c.capture\_day**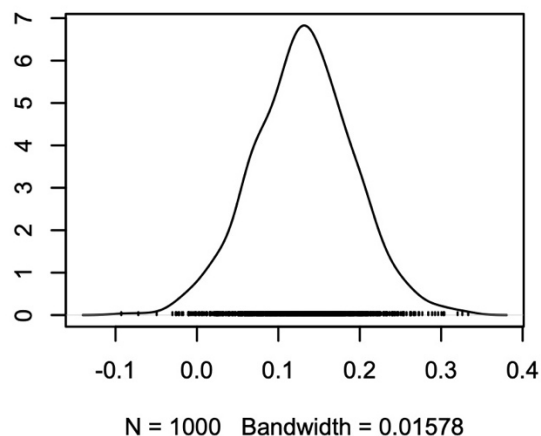**Trace of c.lpi\_crop**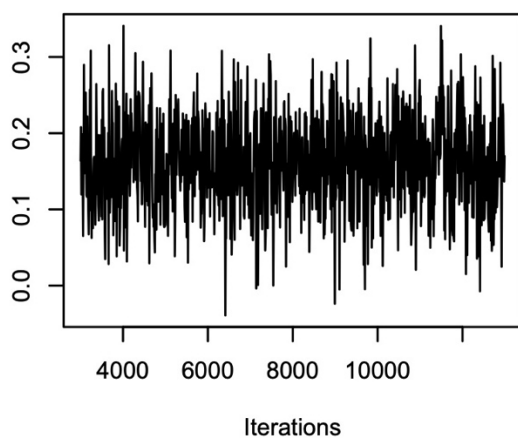**Density of c.lpi\_crop**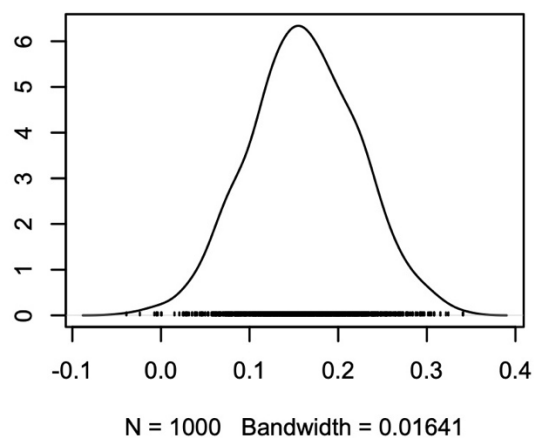

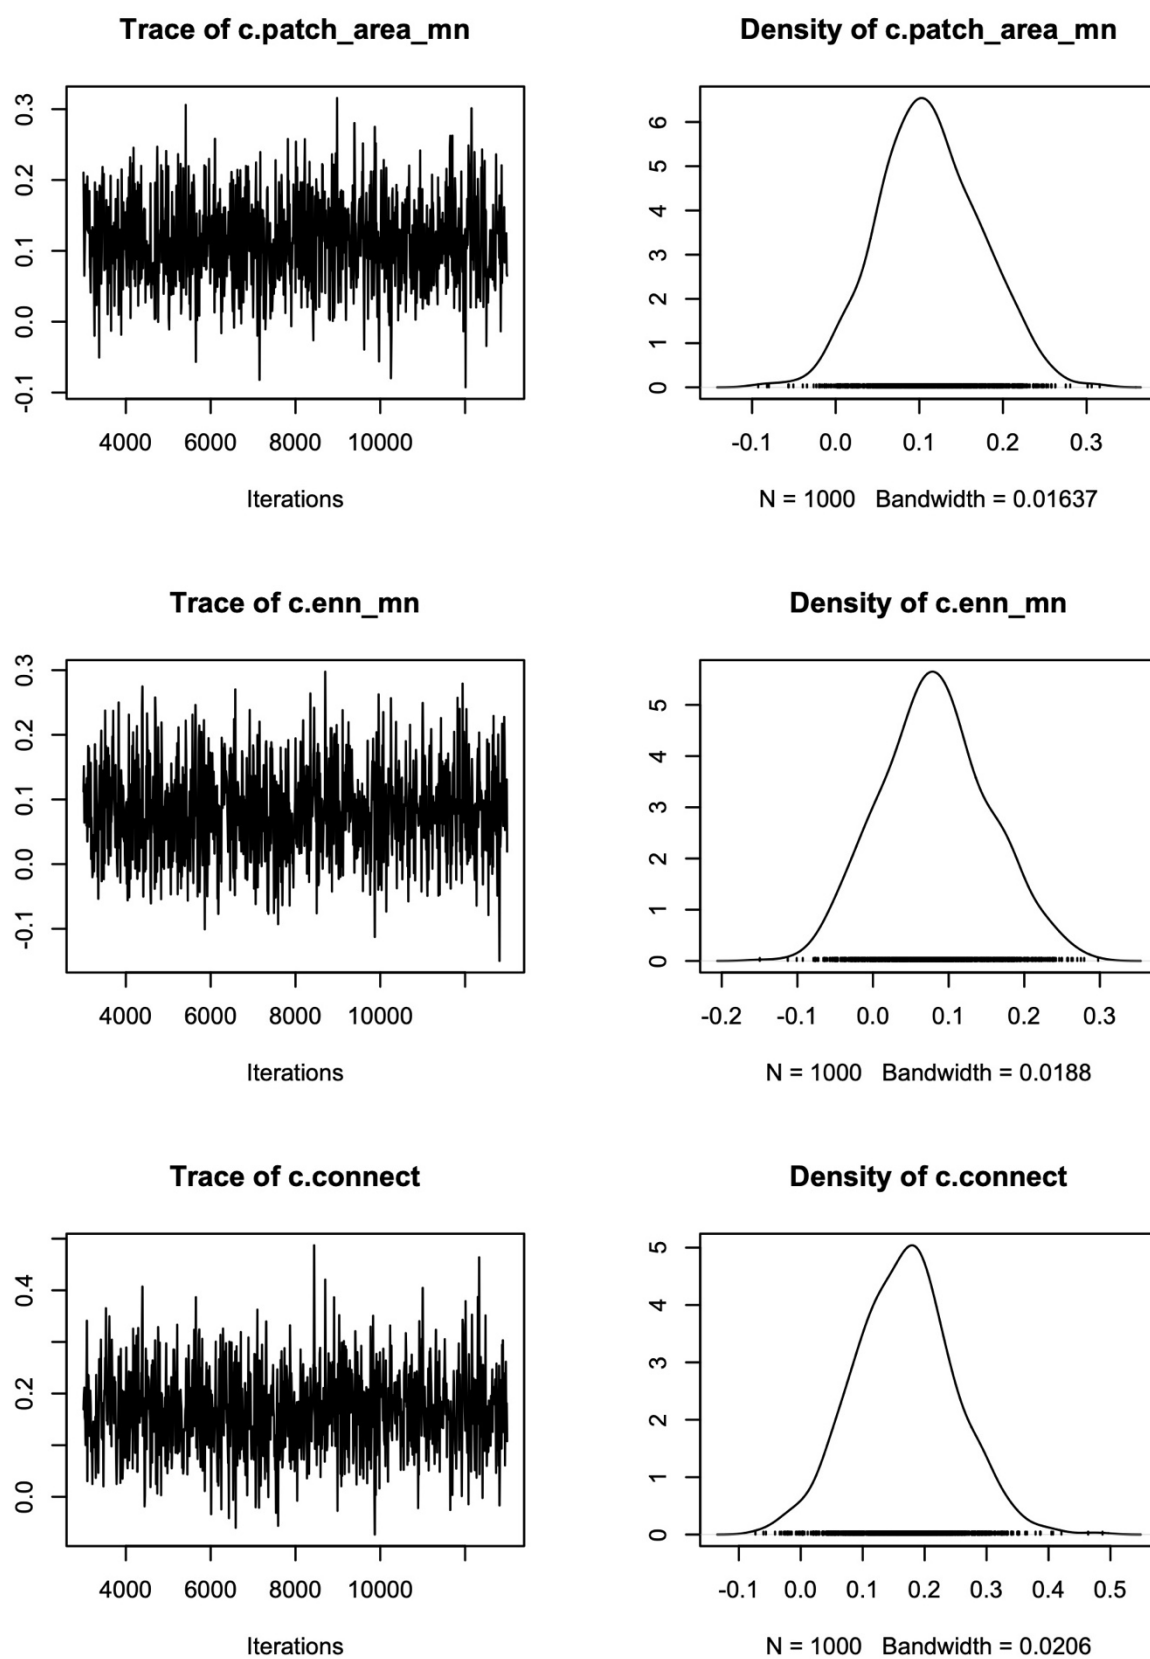

**Figure S3.** Summary of the Markov Chain for the BLMM for resident bird species. Left plots depict the trace of the sampled posterior, and the right plots depicts the density estimate approximating the posterior distribution.

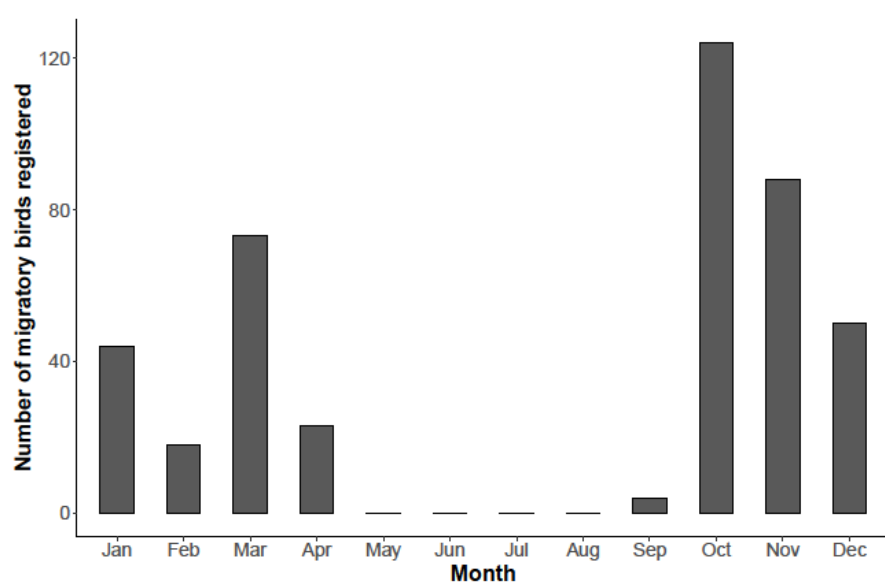

Figure S4. Number of neotropical migrant birds registered on a monthly basis.

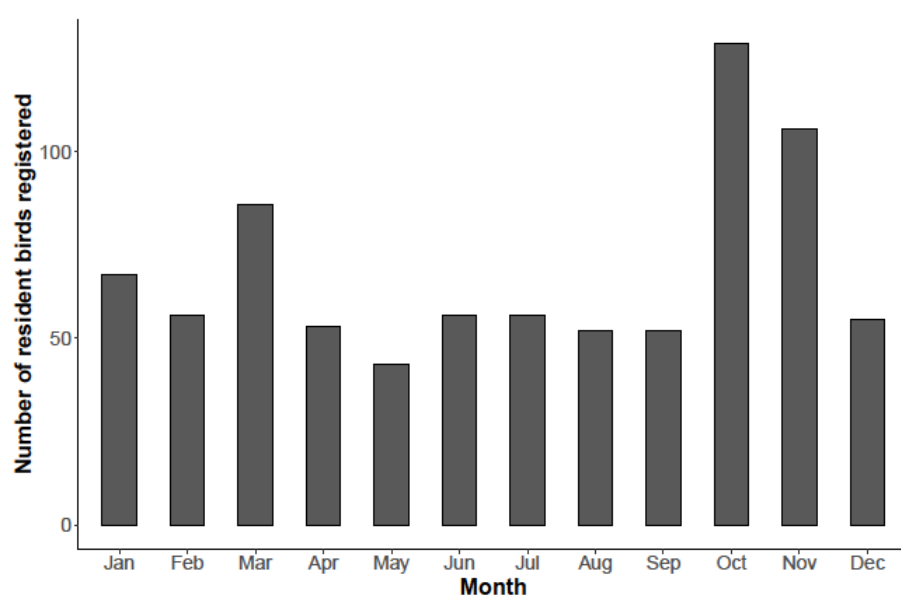

Figure S5. Number of resident birds registered on a monthly basis.
